# Supplementary material for: Assessment of Foods Associated with Sodium and Potassium Intake in Japanese Youths Using the Brief-Type Self-Administered Diet History Questionnaire
Source: MDPI journal article supplement (doi:10.3390/nu13072345), 2021-07-09
Supplement: s1 [file s1]

**Supplementary Table S1. Distribution of food intake as medians of quintile strata (g/1000kcal).**

|                               | Q1    | Q2    | Q3    | Q4    | Q5    |
|-------------------------------|-------|-------|-------|-------|-------|
| Cereals                       | 31.0  | 45.1  | 54.4  | 64.9  | 80.8  |
| Bread                         | 4.6   | 11.5  | 19.5  | 27.0  | 38.0  |
| Noodles                       | 10.7  | 16.6  | 21.5  | 28.5  | 43.5  |
| Vegetables                    | 41.6  | 64.1  | 85.3  | 108.4 | 151.6 |
| Pickles                       | 0.0   | 0.7   | 1.6   | 4.1   | 9.4   |
| Fruits                        | 10.6  | 21.8  | 34.7  | 53.2  | 89.4  |
| Fish                          | 10.5  | 16.8  | 22.7  | 30.5  | 46.5  |
| Salty fish                    | 0.0   | 2.4   | 3.7   | 5.6   | 11.5  |
| Meat                          | 17.2  | 25.2  | 29.7  | 35.7  | 50.2  |
| Processed meat                | 1.2   | 2.2   | 4.3   | 6.0   | 10.5  |
| Dairy products                | 9.1   | 41.8  | 65.8  | 99.8  | 195.4 |
| Confectionaries               | 13.5  | 24.7  | 35.1  | 48.5  | 73.1  |
| Japanese confectionaries      | 0.0   | 1.7   | 2.4   | 4.0   | 9.8   |
| Beverages                     | 144.3 | 260.7 | 335.7 | 418.8 | 576.8 |
| Sugar sweetened beverages     | 8.4   | 28.7  | 59.6  | 103.1 | 222.9 |
| Seasonings/condiments         | 1.1   | 1.3   | 1.5   | 1.8   | 3.4   |
| Soy and other sauces          | 14.7  | 23.4  | 30.8  | 40.6  | 61.3  |
| Noodle soup                   | 0.6   | 0.7   | 0.9   | 1.0   | 1.2   |
| Soybean paste ( <i>miso</i> ) | 41.4  | 60.6  | 77.3  | 92.5  | 147.7 |

Stratification was based on grade- and sex-specific quintiles.
